# Supplementary material for: SWATH‐based proteomics reveals processes associated with immune evasion and metastasis in poor prognosis colorectal tumours
Source: PubMed Central journal article supplement (PMC6850959; doi:10.1111/jcmm.14693), 2019-09-27

Figure S3

b

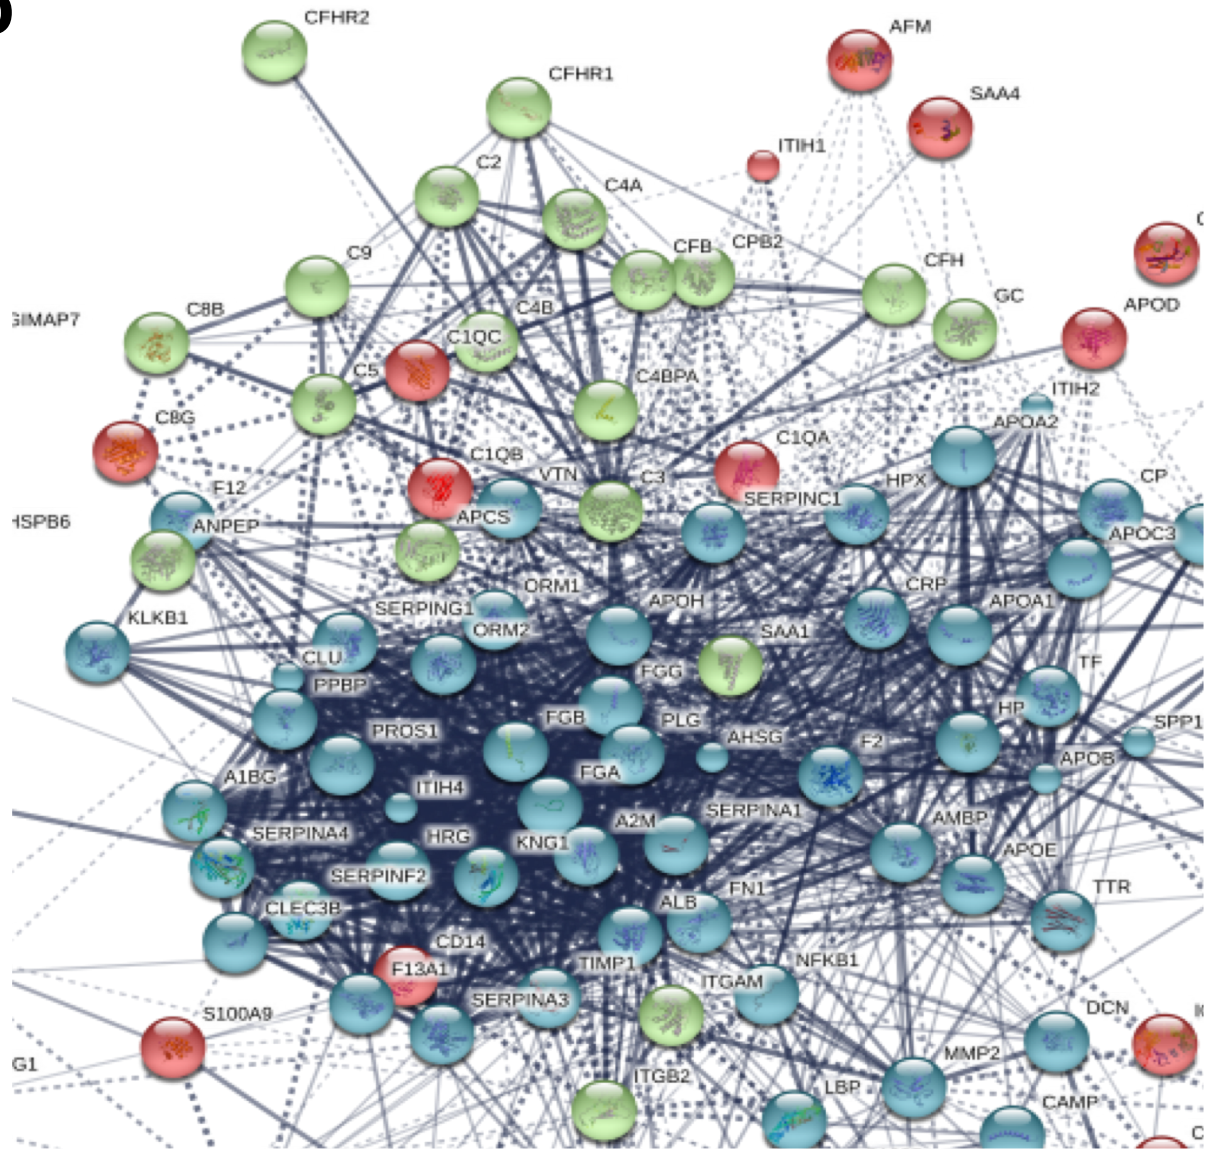

Supplement: JCMM-23-8219-s004.pdf [file JCMM-23-8219-s004.pdf]
